# Supplementary material for: A highly active and durable CuPdPt/C electrocatalyst for an efficient hydrogen evolution reaction
Source: Royal Society of Chemistry journal article supplement (doi:10.1039/c6ta06050a), 2016-01-01
Supplement: c6ta06050a1.pdf [file c6ta06050a1.pdf]

## Electronic Supplementary Information (ESI)

### A highly active and durable CuPdPt/C electrocatalyst for an efficient hydrogen evolution reaction

Tao Ding,<sup>abcd</sup> Zhengyun Wang,<sup>abcd</sup> Li Zhang,<sup>abcd</sup> Chunde Wang,<sup>abcd</sup> Yuan Sun,<sup>abcd</sup>  
and Qing Yang<sup>\*,abcd</sup>

<sup>a</sup>Hefei National Laboratory of Physical Sciences at the Microscale, University of Science and Technology of China (USTC), Hefei 230026, Anhui, P. R. China.

<sup>b</sup>Department of Chemistry, USTC, Hefei 230026, Anhui, P. R. China.

<sup>c</sup>Laboratory of Nanomaterials for Energy Conversion, USTC, Hefei 230026, Anhui, P. R. China.

<sup>d</sup>Synergetic Innovation Center of Quantum Information & Quantum Physics, USTC, Hefei 230026, P. R. China.

\*Corresponding author. E-mail: qyoung@ustc.edu.cn; Fax: +86-551-63606266; Tel: +86-551-63600243.

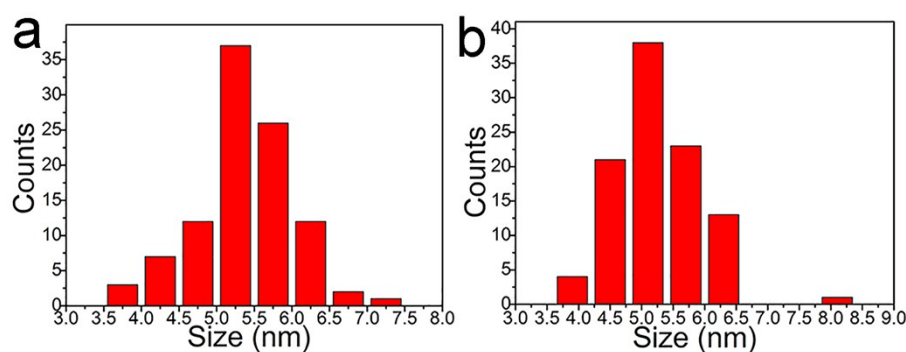

**Fig. S1** The size-distribution histograms of the as-synthesized (a) CuPd and (b) CuPdPt nanocrystals.

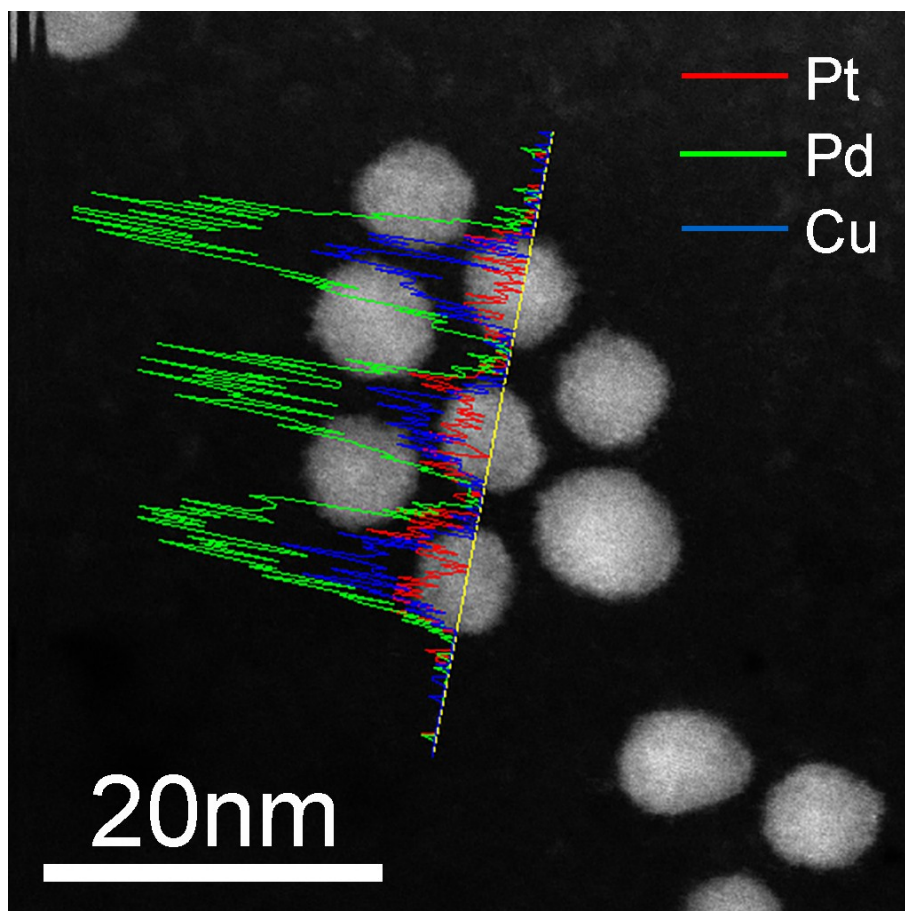

**Fig. S2** EDX line scan of the CuPdPt nanocrystals.

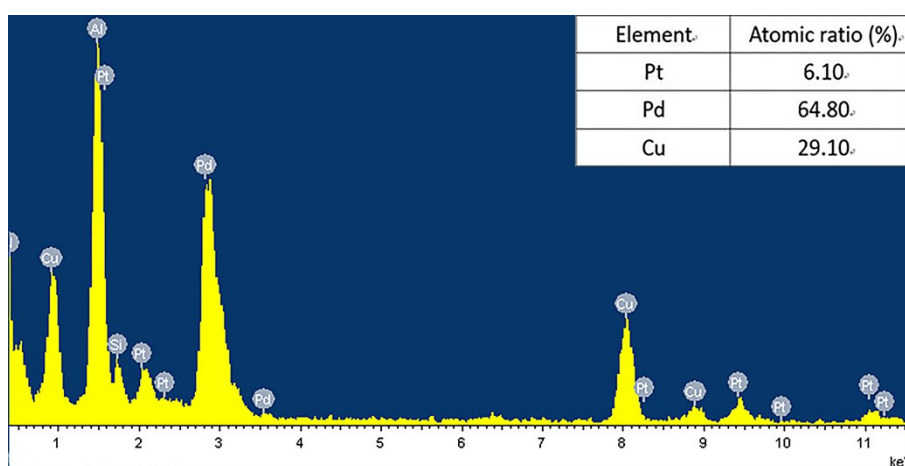

**Fig. S3** EDX spectrum of the as-synthesized CuPdPt nanocrystals shown in Fig. 3. The signal of Al arises from the TEM grid made of elemental Al.

**Table. S1** Elemental Analyses of the CuPdPt nanocrystals by different analytical methods.

| Analyses | Atomic ratio (%) |       |       |
|----------|------------------|-------|-------|
|          | Pt               | Pd    | Cu    |
| EDX      | 6.10             | 64.80 | 29.10 |
| XPS      | 6.30             | 60.87 | 32.83 |
| ICP-AES  | 5.72             | 60.54 | 33.74 |

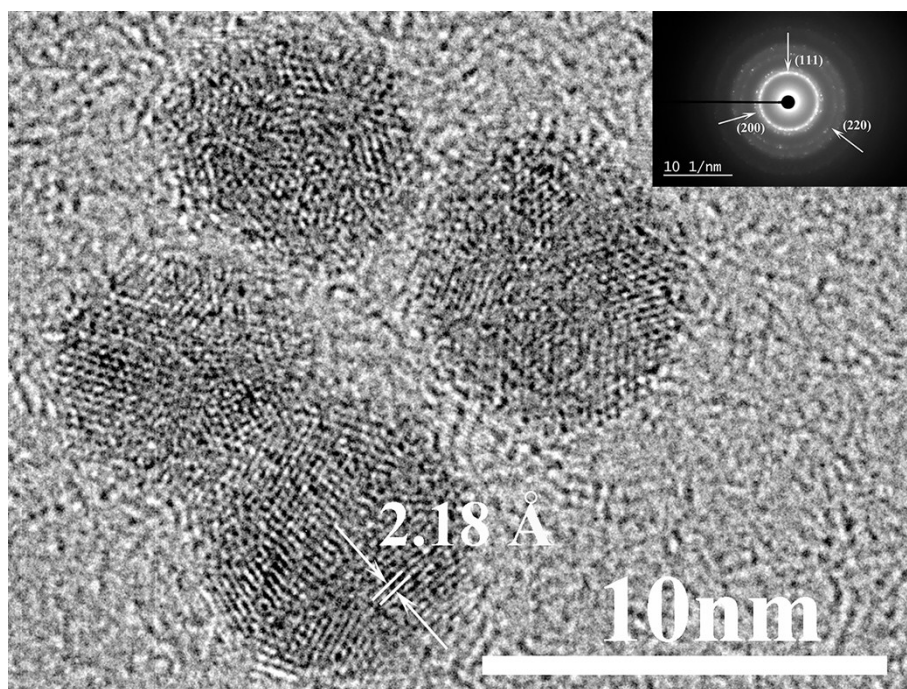

**Fig. S4** HRTEM image and corresponding SEAD pattern of the CuPdPt nanocrystals.

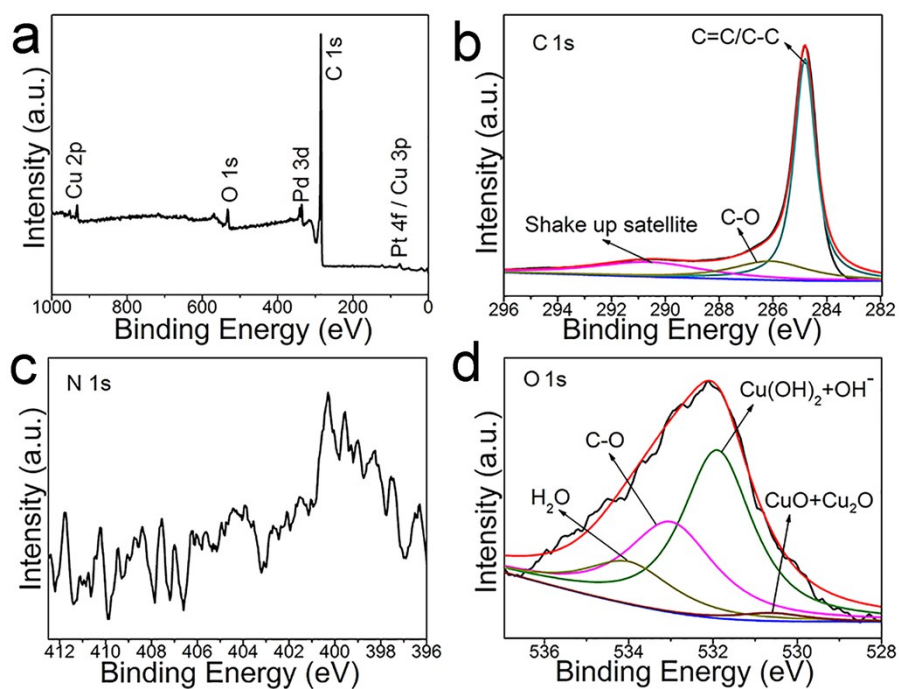

**Fig. S5** XPS survey spectrum (a) and the close-up spectra of C 1s (b), N 1s (c), O 1s (d) of the CuPdPt/C catalyst.

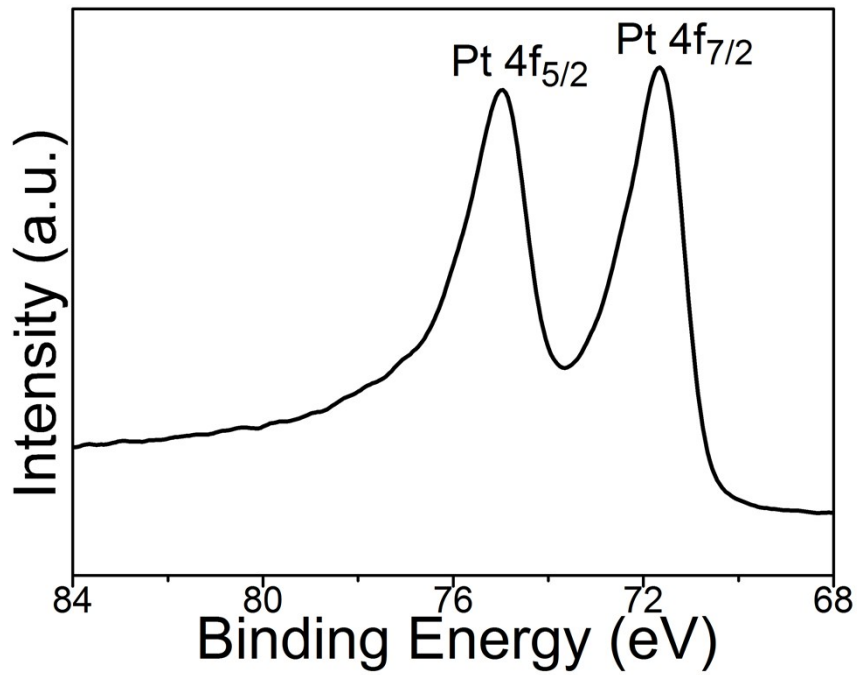

Fig. S6 The close-up XPS spectrum of Pt 4f in the commercial Pt/C (60 wt%).

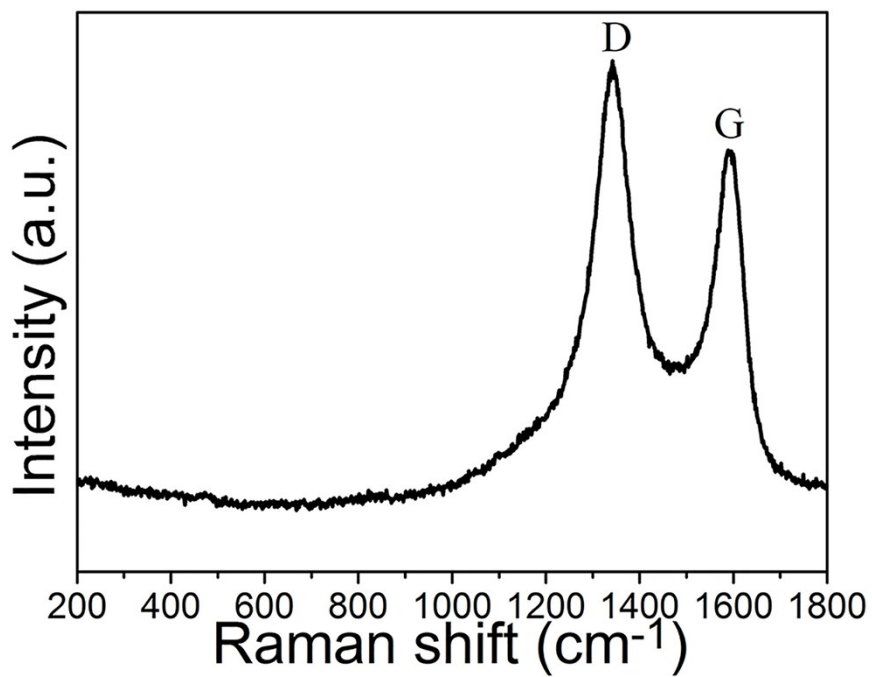

Fig. S7 Raman spectrum of the as-prepared CuPdPt/C catalyst.

**Table S2** Comparison of the HER performance for the present CuPdPt/C catalyst with other recent reported Pt-based HER electrocatalysts.

| Catalyst                                                   | Electrolyte                          | Onset potential (mV) | Tafel slope (mV/dec) | $\eta_{10}$ (mV) | Exchange current density(mA/cm <sup>2</sup> ) | Reference                                                       |
|------------------------------------------------------------|--------------------------------------|----------------------|----------------------|------------------|-----------------------------------------------|-----------------------------------------------------------------|
| Pt/BCF                                                     | 0.5 M H <sub>2</sub> SO <sub>4</sub> | N/A                  | 32                   | 55               | N/A                                           | <i>Catal. Today</i> , 2016, <b>262</b> , 141-145                |
| PtFeCo TriStar                                             | 0.5 M H <sub>2</sub> SO <sub>4</sub> | N/A                  | 21/22/24 /25         | N/A              | N/A                                           | <i>Adv. Mater.</i> , 2016, <b>28</b> , 2077-2084                |
| Pt-Ni/C                                                    | 0.1 M KOH                            | N/A                  | 59                   | N/A              | N/A                                           | <i>J. Mater. Chem. A</i> , 2016, <b>4</b> , 12392-12397         |
| Pt <sub>13</sub> Cu <sub>73</sub> Ni <sub>14</sub> /CNF@CF | 1 M H <sub>2</sub> SO <sub>4</sub>   | N/A                  | 38                   | N/A              | N/A                                           | <i>ACS Appl. Mater. Interfaces</i> , 2016, <b>8</b> , 3464-3472 |
| Pt-Pd-rGO                                                  | 0.5 M H <sub>2</sub> SO <sub>4</sub> | N/A                  | 10/22/25             | N/A              | N/A                                           | <i>Angew. Chem. Int. Ed.</i> , 2014, <b>53</b> , 12120-12124    |
| Pt/MoS <sub>2</sub>                                        | 0.5 M H <sub>2</sub> SO <sub>4</sub> | N/A                  | 40                   | N/A              | N/A                                           | <i>Nat. Commun.</i> , 2013, <b>4</b> , 1444                     |
| CuPdPt/C                                                   | 0.5 M H <sub>2</sub> SO <sub>4</sub> | ~-25                 | 25                   | 55               | 0.07                                          | Present work                                                    |

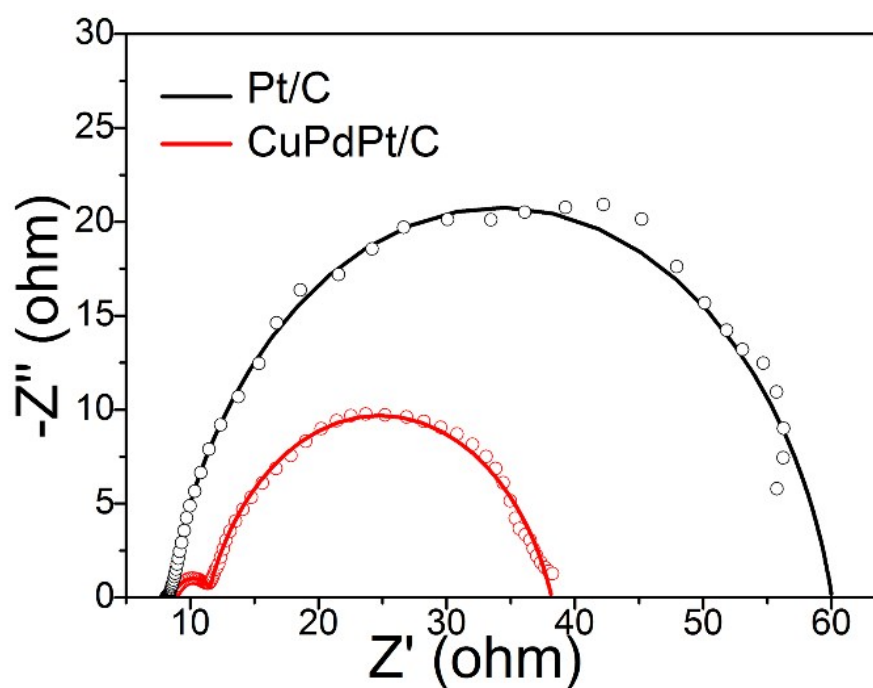

**Fig. S8** Nyquist plots of the CuPdPt/C and commercial Pt/C catalysts at an overpotential of 50 mV.

Z' is real impedance, and Z'' is imaginary impedance.



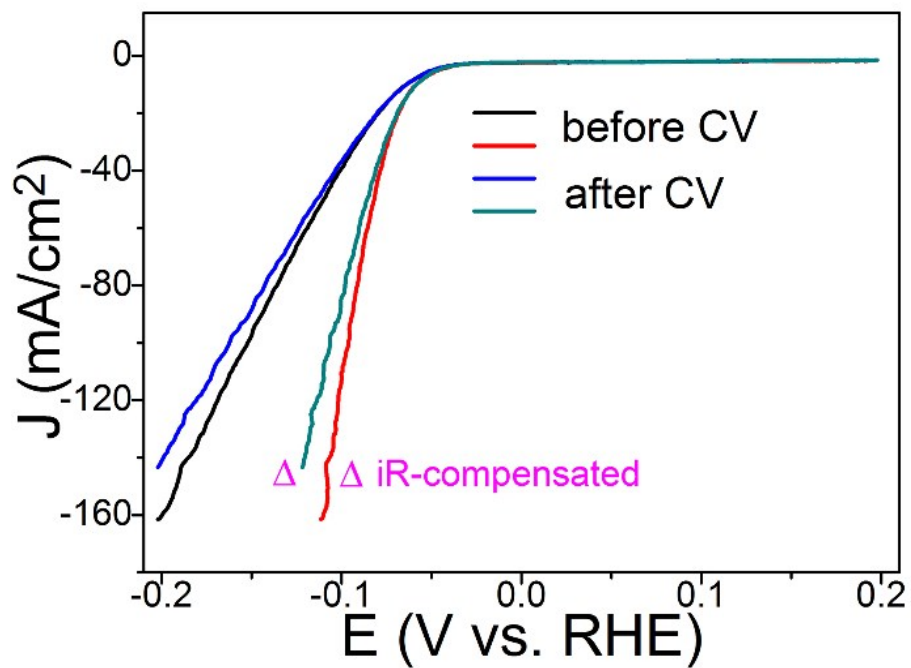

**Fig. S9** Durability test for the commercial 60 wt% Pt/C catalyst before and after iR-compensation, respectively.

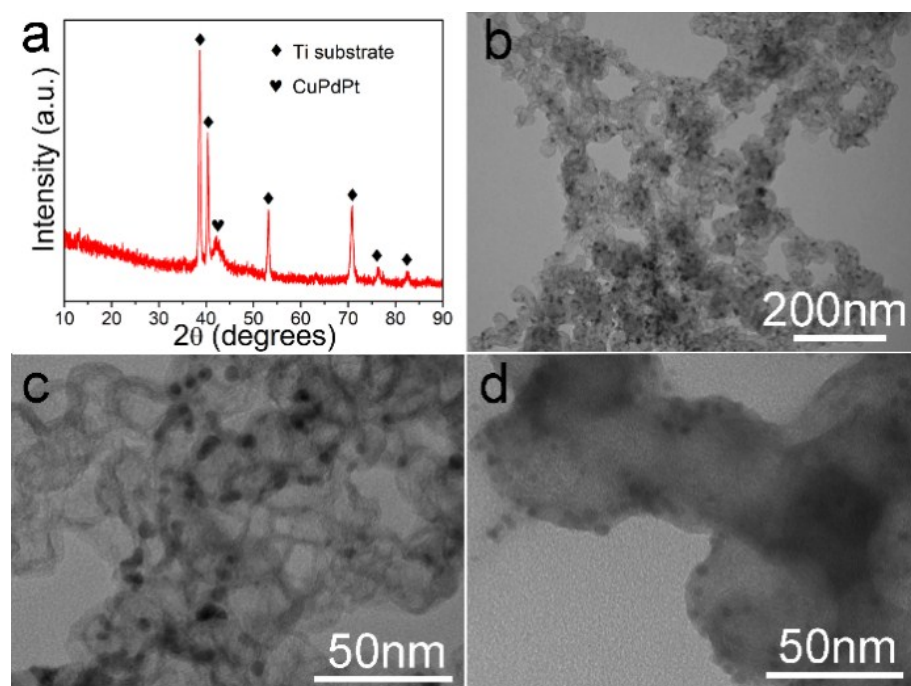

**Fig. S10** XRD pattern (a) and TEM images (b-d) of the spent catalyst after HER stability test.

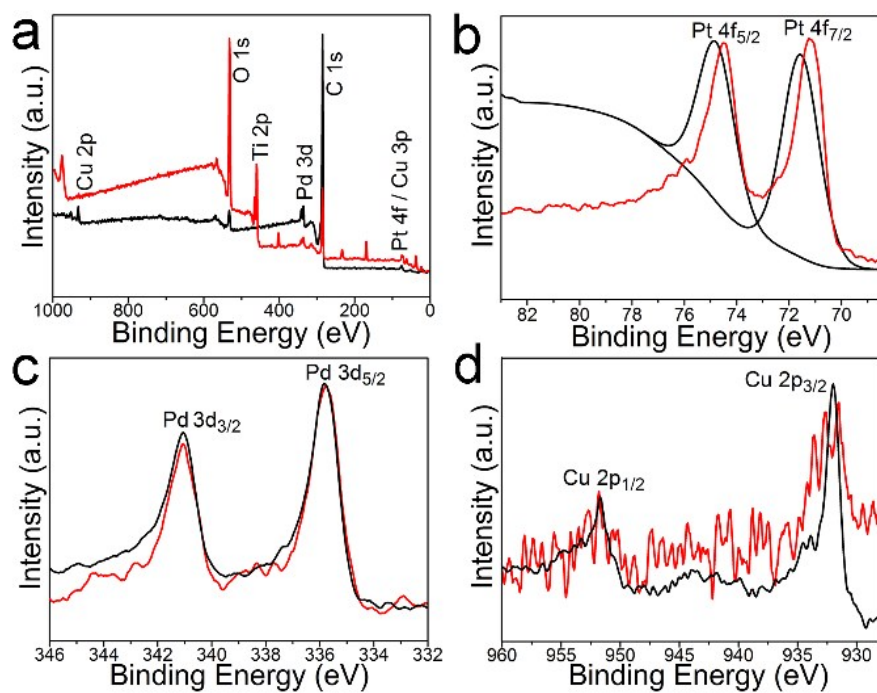

**Fig. S11** Comparison of XPS spectra for the catalyst before (black) and after (red) HER stability test: survey spectrum (a), spectra of Pt 4f (b), Pd 3d (c) and Cu 2p (d), respectively.

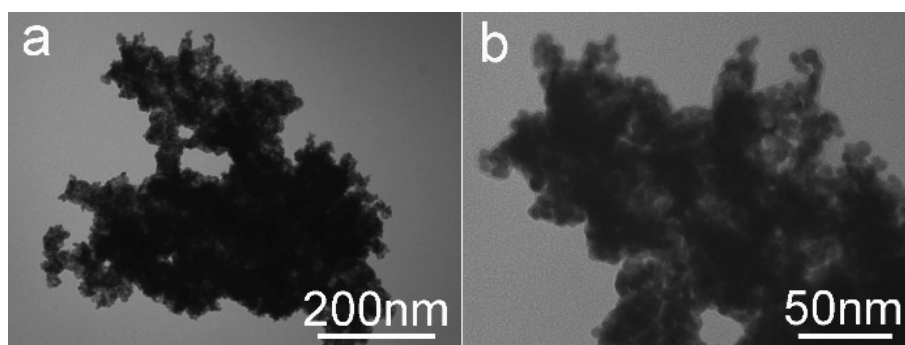

**Fig. S12** TEM images of the CuPdPt nanocrystals directly loaded on Ti substrate after HER stability test.
